# Supplementary material for: Exploratory qualitative study to understand the underlying motivations and strategies of the private for-profit healthcare sector in urban Bangladesh
Source: PubMed Central journal article supplement — BMJ Open. 2019 Jul 3;9(7):e026586. doi: 10.1136/bmjopen-2018-026586 (PMC6615794; doi:10.1136/bmjopen-2018-026586), 2019-07-03
Supplement: bmjopen-2018-026586supp001.pdf [file bmjopen-2018-026586supp001.pdf]

Annex 1:

Box 1: Operational definition of facilities by their types

| Facility Type      | Definitions                                                                                             |
|--------------------|---------------------------------------------------------------------------------------------------------|
| Hospital           | Any formal institution providing both outdoor and indoor services with more than 30 beds ( $\geq 31$ ). |
| Clinic             | Any formal institution with or without indoor services having less than or equal 30 beds ( $\leq 30$ ). |
| Diagnostic Center  | Facilities that provide medical testing and imaging facilities and some out-patient services.           |
| Blood Bank         | A facility that provided blood collection, preservation and sometimes transfusion services exclusively. |
| Doctors' Chamber   | Private or sole practice, either standalone or attached to a drug or optic shop.                        |
| Drug Shop          | A formal or informal (unlicensed) facility that sells drugs as its primary service.                     |
| Optic Shop         | A formal or informal facility that provides optical services.                                           |
| Static Services    | Services provided at a fixed location on a regular basis.                                               |
| Satellite Services | Services provided at designated locations on certain hours and days of the week.                        |
